# Supplementary material for: Reversible carboxylation of N-heterocyclic carbenesElectronic supplementary information (ESI) available: crystal structure data and ORTEP for 1,3-bis(2,6-diisopropylphenyl)imidazolylium-2-carboxylate (3). See http://www.rsc.org/suppdata/cc/b3/b311350g/
Source: Royal Society of Chemistry journal article supplement (doi:10.1039/b311350g), 2003-12-19
Supplement: b311350g.doc [file b311350g.doc]

# Reversible carboxylation of N-heterocyclic carbenes.

Hung A. Duong, Thomas N. Tekavec, Atta M. Arif, and Janis Louie*

Department of Chemistry, University of Utah, 315 South 1400 East, Salt Lake City, UT, USA, 84112. Fax: (801) 581-8433; Tel: (801)581-7309; E-mail: louie@chem.utah.edu

Supporting Information

**Table 1.** Crystal data and structure refinement for IPrCO2 (**3**).

Empirical formula C28 H36 N2 O2

Formula weight 432.59

Temperature 150(1) K

Wavelength 0.71073 Å

Crystal system Monoclinic

Space group *P* 21/*n*

Unit cell dimensions a = 12.6385(7) Å = 90°.

b = 12.5779(8) Å = 92.993(2)°.

c = 16.6868(12) Å  = 90°.

Volume 2649.0(3) Å3

Z 4

Density (calculated) 1.085 Mg/m3

Absorption coefficient 0.068 mm-1

F(000) 936

Crystal size 0.25 x 0.15 x 0.03 mm3

Theta range for data collection 3.46 to 25.41°.

Index ranges -15<=h<=15, -15<=k<=14, -20<=l<=20

Reflections collected 9106

Independent reflections 4822 [R(int) = 0.0721]

Completeness to theta = 25.41° 99.1 %

Absorption correction Multi-Scan

Max. and min. transmission 0.9980 and 0.9833

Refinement method Full-matrix least-squares on F2

Data / restraints / parameters 4822 / 0 / 422

Goodness-of-fit on F2 1.033

Final R indices [I>2sigma(I)] R1 = 0.0825, wR2 = 0.1886

R indices (all data) R1 = 0.1638, wR2 = 0.2314

Largest diff. peak and hole 0.517 and -0.342 e.Å-3

**Special Refinement Details**

A colorless plateshaped crystal 0.25 x 0.15 x 0.03mm in size was mounted on a glass fiber with traces of viscous oil and then transferred to a Nonius KappaCCD diffractometer equipped with Mo Ka radiation (l = 0.71073 Å). Ten frames of data were collected at 150(1)K with an oscillation range of *1* deg/frame and an exposure time of *20* sec/frame. [REF1] Indexing and unit cell refinement based on all observed reflection from those ten frames, indicated a monoclinic *P* lattice. A total of 9106 reflections (Θmax = 25.41°) were indexed, integrated and corrected for Lorentz, polarization and absorption effects using DENZO-SMN and SCALEPAC. [REF 2] Post refinement of the unit cell gave *a* = 12.6385(7) Å, b = 12.5779(8) Å, c = 16.6868(12) Å,  =92.993(2), and V = 2649.0(3) Å3. Axial photographs and systematic absences were consistent with the compound having crystallized in the monoclinic space group *P*21/*n.*

The structure was solved by a combination of direct methods and heavy atom using SIR 97. [REF 3]

All of the non-hydrogen atoms were refined with anisotropic displacement coefficients. Hydrogen atoms were located and refined isotropically using SHELXL97. [REF 4] The weighting scheme employed was w = 1/[s2(Fo2) + (0.1218P)2  + 0P] where P = (Fo2 + 2Fc2)/3. The refinement converged to R1 = 0.0825, wR2 = 0.1886, and S = 1.033for 2525reflections with 1> 2s(I), and R1 = 0.1638, wR2 = 0.2314, and S = 1.033 for 4822 unique reflections and 422 parameters. [REF 5] The maximum / in the final cycle of the least-squares was 0, and the residual peaks on the final difference-Fourier map ranged from -0.342 to 0.517 e/Å3. Scattering factors were taken from the International Tables for Crystallography, Volume C. [REF 6, REF 7]

The crystallographic data has been deposited in the Cambridge Database (CCDC), 12 Union Road, Cambridge CB2 1EZ, UK and copies can be obtained on request, free of charge, by quoting the publication citation and the deposition number 219086.

REF 1 COLLECT Data Collection Software. Nonius B.V. 1998.

REF 2 Otwinowski, Z.; Minor, W., “Processing of X-ray Diffraction Data Collected in Oscillation Mode”, Methods Enzymol. 1997, 276, 307-326.

REF 3 SIR97 (Release 1.02) - A program for automatic solution and refinement of crystal structure. A. Altomare, M.C. Burla, M. Camalli, G. Cascarano, C. Giacovazzo, A. Guagliardi, A.G. G. Moliteni, G. Polidori, and R. Spagna.

REF 4 SHELX97 [Includes SHELXS97, SHELXL97, CIFTAB ] - Sheldrick, G. M. (1997). Programs for Crystal Structure Analysis (Release 97-2). University of Göttingen, Germany.

REF 5 R1 = S( || Fo | – |Fc || ) / S |Fo|, wR2 = [ S(w(Fo2 – Fc2)2) / S(Fo2)2]1/2, and S = Goodness-of-fit on F2 = [ S( w(Fo2 – Fc2)2 / (n-p) ]1/2, where n is the number of reflections and p is the number of parameters refined.

REF 6 Maslen, E. N.; Fox, A. G.; O’Keefe, M. A., International Tables for Crystallography: Mathemetical, Physical and Chemical Tables, Vol. C, Chapter 6, Wilson, A. J. C., Ed.; Kluwer, Dordrecht, The Netherlands, 1992; pp. 476-516.

REF 7 Creagh, D. C.; McdAuley, W. J., International Tables for Crystallography: mathematical, Physical and Chemical tables, Vol. C, Chapter 4 Wilson, A. J. C., Ed.; Kluwer, Dordrecht, The Netherlands, 1992; pp. 206-222.

REF8 ORTEP3 for Windows - L. J. Farrugia, *J. Appl. Crystallogr*. **1997**, *30*, 565.

REF9 WinGX A Windows Program for Crystal Structure Analysis. L. J. Farrugia, University of Glasgow, Glasgow, 1998.

**Table 2.** Atomic coordinates ( x 104) and equivalent isotropic displacement parameters (Å2x 103) IPrCO2 (**3**). U(eq) is defined as one third of the trace of the orthogonalized Uij tensor.

________________________________________________________________________________

x y z U(eq)

________________________________________________________________________________________________________________________________________________________________________________________________________

O(1) 2478(2) -1(2) 1360(2) 49(1)

O(2) 3902(2) -2(2) 2194(2) 49(1)

N(1) 2587(2) 2171(2) 2376(1) 26(1)

N(3) 3604(2) 2297(2) 1391(1) 26(1)

C(2) 3121(2) 1606(2) 1854(2) 25(1)

C(4) 3376(3) 3330(3) 1638(2) 37(1)

C(5) 2743(3) 3239(2) 2250(2) 37(1)

C(6) 3178(3) 410(2) 1791(2) 32(1)

C(7) 1932(3) 1720(2) 2984(2) 31(1)

C(8) 2418(3) 1509(2) 3735(2) 34(1)

C(9) 1752(4) 1120(3) 4313(2) 47(1)

C(10) 687(4) 947(3) 4132(2) 46(1)

C(11) 249(3) 1141(3) 3371(2) 44(1)

C(12) 870(3) 1534(2) 2771(2) 35(1)

C(13) 3572(3) 1701(3) 3939(2) 47(1)

C(14) 4123(5) 709(4) 4297(4) 76(2)

C(15) 3729(5) 2647(4) 4505(3) 64(1)

C(16) 375(3) 1772(3) 1952(2) 44(1)

C(17) -200(4) 814(4) 1584(3) 63(1)

C(18) -353(5) 2736(4) 1980(3) 60(1)

C(19) 4266(3) 1981(2) 740(2) 28(1)

C(20) 5335(3) 1813(2) 925(2) 33(1)

C(21) 5924(3) 1477(3) 290(2) 43(1)

C(22) 5465(3) 1331(3) -463(2) 42(1)

C(23) 4410(3) 1495(3) -618(2) 41(1)

C(24) 3762(3) 1834(2) -11(2) 33(1)

C(25) 5857(3) 1991(3) 1759(2) 50(1)

C(26) 6508(5) 1055(5) 2045(4) 74(2)

C(27) 6481(4) 3035(4) 1757(3) 76(2)

C(28) 2589(3) 2035(3) -193(2) 44(1)

C(29) 2030(5) 1104(5) -591(4) 76(2)

C(30) 2449(5) 3056(5) -682(4) 76(2)

________________________________________________________________________________

**Table 3.** Bond lengths [Å] and angles [°] for IPrCO2 (**3**).

_____________________________________________________

O(1)-C(6) 1.225(4)

O(2)-C(6) 1.221(4)

N(1)-C(2) 1.334(4)

N(1)-C(5) 1.376(4)

N(1)-C(7) 1.457(4)

N(3)-C(2) 1.332(4)

N(3)-C(4) 1.398(4)

N(3)-C(19) 1.460(4)

C(2)-C(6) 1.511(4)

C(4)-C(5) 1.334(5)

C(4)-H(4) 0.88(3)

C(5)-H(5) 0.97(3)

C(7)-C(12) 1.390(5)

C(7)-C(8) 1.392(4)

C(8)-C(9) 1.401(5)

C(8)-C(13) 1.500(5)

C(9)-C(10) 1.381(6)

C(9)-H(9) 0.96(3)

C(10)-C(11) 1.379(5)

C(10)-H(10) 0.94(3)

C(11)-C(12) 1.394(5)

C(11)-H(11) 1.03(4)

C(12)-C(16) 1.504(5)

C(13)-C(15) 1.524(6)

C(13)-C(14) 1.535(6)

C(13)-H(13) 1.05(4)

C(14)-H(14A) 0.95(5)

C(14)-G(14B) 1.08(5)

C(14)-H(14C) 1.00(5)

C(15)-H(15A) 0.91(5)

C(15)-H(15B) 0.93(6)

C(15)-H(15C) 1.10(6)

C(16)-C(17) 1.519(5)

C(16)-C(18) 1.524(6)

C(16)-H(16) 0.96(4)

C(17)-H(17A) 1.01(4)

C(17)-H(17B) 0.94(4)

C(17)-H(17C) 1.08(5)

C(18)-H(18A) 0.98(5)

C(18)-H(18B) 0.89(4)

C(18)-H(18C) 1.00(5)

C(19)-C(20) 1.387(5)

C(19)-C(24) 1.389(4)

C(20)-C(21) 1.393(5)

C(20)-C(25) 1.525(5)

C(21)-C(22) 1.368(5)

C(21)-H(21) 0.92(4)

C(22)-C(23) 1.361(5)

C(22)-H(22) 0.94(4)

C(23)-C(24) 1.401(5)

C(23)-H(23) 1.01(4)

C(24)-C(28) 1.519(5)

C(25)-C(26) 1.499(6)

C(25)-C(27) 1.531(6)

C(25)-H(25) 0.97(4)

C(26)-H(26A) 1.00(5)

C(26)-H(26B) 1.04(5)

C(26)-H(26C) 1.03(5)

C(27)-H(27A) 0.9800

C(27)-H(27B) 0.9800

C(27)-H(27C) 0.9800

C(28)-C(29) 1.503(6)

C(28)-C(30) 1.527(6)

C(28)-H(28) 0.97(3)

C(29)-H(29A) 0.99(4)

C(29)-H(29B) 0.96(5)

C(29)-H(29C) 1.00(6)

C(30)-H(30A) 1.12(6)

C(30)-H(30B) 0.90(6)

C(30)-H(30C) 1.02(5)

C(2)-N(1)-C(5) 109.8(3)

C(2)-N(1)-C(7) 124.8(2)

C(5)-N(1)-C(7) 125.3(3)

C(2)-N(3)-C(4) 109.1(2)

C(2)-N(3)-C(19) 123.5(2)

C(4)-N(3)-C(19) 127.4(2)

N(3)-C(2)-N(1) 107.1(2)

N(3)-C(2)-C(6) 125.7(2)

N(1)-C(2)-C(6) 127.2(3)

C(5)-C(4)-N(3) 106.7(3)

C(5)-C(4)-H(4) 132.9(19)

N(3)-C(4)-H(4) 120.3(19)

C(4)-C(5)-N(1) 107.3(3)

C(4)-C(5)-H(5) 134.4(18)

N(1)-C(5)-H(5) 118.4(18)

O(2)-C(6)-O(1) 129.9(3)

O(2)-C(6)-C(2) 115.0(3)

O(1)-C(6)-C(2) 115.1(3)

C(12)-C(7)-C(8) 124.9(3)

C(12)-C(7)-N(1) 117.6(3)

C(8)-C(7)-N(1) 117.5(3)

C(7)-C(8)-C(9) 115.7(3)

C(7)-C(8)-C(13) 123.4(3)

C(9)-C(8)-C(13) 120.8(3)

C(10)-C(9)-C(8) 121.2(4)

C(10)-C(9)-H(9) 116(2)

C(8)-C(9)-H(9) 123(2)

C(11)-C(10)-C(9) 120.9(4)

C(11)-C(10)-H(10) 122.4(19)

C(9)-C(10)-H(10) 116.6(19)

C(10)-C(11)-C(12) 120.6(4)

C(10)-C(11)-H(11) 115(2)

C(12)-C(11)-H(11) 125(2)

C(7)-C(12)-C(11) 116.7(3)

C(7)-C(12)-C(16) 123.3(3)

C(11)-C(12)-C(16) 120.0(3)

C(8)-C(13)-C(15) 111.1(4)

C(8)-C(13)-C(14) 111.9(4)

C(15)-C(13)-C(14) 110.6(4)

C(8)-C(13)-H(13) 108(2)

C(15)-C(13)-H(13) 104(2)

C(14)-C(13)-H(13) 111(2)

C(13)-C(14)-H(14A) 113(3)

C(13)-C(14)-G(14B) 107(2)

H(14A)-C(14)-G(14B) 102(4)

C(13)-C(14)-H(14C) 107(3)

H(14A)-C(14)-H(14C) 113(4)

G(14B)-C(14)-H(14C) 114(4)

C(13)-C(15)-H(15A) 102(3)

C(13)-C(15)-H(15B) 105(3)

H(15A)-C(15)-H(15B) 116(5)

C(13)-C(15)-H(15C) 104(3)

H(15A)-C(15)-H(15C) 123(4)

H(15B)-C(15)-H(15C) 106(4)

C(12)-C(16)-C(17) 112.2(4)

C(12)-C(16)-C(18) 110.7(3)

C(17)-C(16)-C(18) 111.5(4)

C(12)-C(16)-H(16) 104(2)

C(17)-C(16)-H(16) 108(2)

C(18)-C(16)-H(16) 111(2)

C(16)-C(17)-H(17A) 114(2)

C(16)-C(17)-H(17B) 112(2)

H(17A)-C(17)-H(17B) 109(3)

C(16)-C(17)-H(17C) 102(2)

H(17A)-C(17)-H(17C) 116(3)

H(17B)-C(17)-H(17C) 103(3)

C(16)-C(18)-H(18A) 103(3)

C(16)-C(18)-H(18B) 111(3)

H(18A)-C(18)-H(18B) 110(4)

C(16)-C(18)-H(18C) 106(3)

H(18A)-C(18)-H(18C) 105(4)

H(18B)-C(18)-H(18C) 119(4)

C(20)-C(19)-C(24) 125.2(3)

C(20)-C(19)-N(3) 117.7(3)

C(24)-C(19)-N(3) 117.0(3)

C(19)-C(20)-C(21) 115.5(3)

C(19)-C(20)-C(25) 123.4(3)

C(21)-C(20)-C(25) 121.1(3)

C(22)-C(21)-C(20) 121.4(4)

C(22)-C(21)-H(21) 120(2)

C(20)-C(21)-H(21) 119(2)

C(23)-C(22)-C(21) 121.3(4)

C(23)-C(22)-H(22) 116(2)

C(21)-C(22)-H(22) 123(2)

C(22)-C(23)-C(24) 120.9(4)

C(22)-C(23)-H(23) 120(2)

C(24)-C(23)-H(23) 119(2)

C(19)-C(24)-C(23) 115.8(3)

C(19)-C(24)-C(28) 123.7(3)

C(23)-C(24)-C(28) 120.5(3)

C(26)-C(25)-C(20) 112.2(4)

C(26)-C(25)-C(27) 113.6(4)

C(20)-C(25)-C(27) 108.8(3)

C(26)-C(25)-H(25) 110(2)

C(20)-C(25)-H(25) 105(2)

C(27)-C(25)-H(25) 107(2)

C(25)-C(26)-H(26A) 107(3)

C(25)-C(26)-H(26B) 114(2)

H(26A)-C(26)-H(26B) 99(4)

C(25)-C(26)-H(26C) 109(3)

H(26A)-C(26)-H(26C) 119(4)

H(26B)-C(26)-H(26C) 109(4)

C(25)-C(27)-H(27A) 109.5

C(25)-C(27)-H(27B) 109.5

H(27A)-C(27)-H(27B) 109.5

C(25)-C(27)-H(27C) 109.5

H(27A)-C(27)-H(27C) 109.5

H(27B)-C(27)-H(27C) 109.5

C(29)-C(28)-C(24) 112.9(4)

C(29)-C(28)-C(30) 112.3(5)

C(24)-C(28)-C(30) 109.3(4)

C(29)-C(28)-H(28) 107(2)

C(24)-C(28)-H(28) 107(2)

C(30)-C(28)-H(28) 107.8(19)

C(28)-C(29)-H(29A) 104(2)

C(28)-C(29)-H(29B) 105(3)

H(29A)-C(29)-H(29B) 123(4)

C(28)-C(29)-H(29C) 111(3)

H(29A)-C(29)-H(29C) 106(4)

H(29B)-C(29)-H(29C) 108(4)

C(28)-C(30)-H(30A) 109(3)

C(28)-C(30)-H(30B) 117(4)

H(30A)-C(30)-H(30B) 107(5)

C(28)-C(30)-H(30C) 115(3)

H(30A)-C(30)-H(30C) 106(4)

H(30B)-C(30)-H(30C) 103(4)

_____________________________________________________________

Symmetry transformations used to generate equivalent atoms:

**Table 4.** Anisotropic displacement parameters (Å2x 103) for IPrCO2 (**3**). The anisotropic

displacement factor exponent takes the form: -22[ h2a*2U11 + ... + 2 h k a* b* U12 ]

______________________________________________________________________________

U11 U22 U33 U23 U13 U12

___________________________________________________________________________________________________________________________________________________________________________________________________

O(1) 60(2) 29(1) 58(2) -9(1) 8(2) -7(1)

O(2) 59(2) 32(1) 57(2) 7(1) 11(1) 10(1)

N(1) 31(2) 22(1) 26(1) -3(1) 10(1) 1(1)

N(3) 32(2) 21(1) 26(1) 0(1) 11(1) 0(1)

C(2) 29(2) 26(2) 21(2) 0(1) 7(1) 3(1)

C(4) 49(2) 25(2) 38(2) 2(1) 14(2) -6(2)

C(5) 47(2) 25(2) 42(2) -4(2) 17(2) 2(2)

C(6) 38(2) 27(2) 33(2) 2(2) 16(2) -1(2)

C(7) 37(2) 24(2) 31(2) 0(1) 11(2) 4(1)

C(8) 41(2) 32(2) 31(2) 0(1) 8(2) 12(2)

C(9) 68(3) 41(2) 33(2) 5(2) 19(2) 11(2)

C(10) 59(3) 39(2) 43(2) 3(2) 32(2) 4(2)

C(11) 41(3) 37(2) 55(3) -2(2) 23(2) -5(2)

C(12) 36(2) 31(2) 38(2) -5(1) 8(2) 0(1)

C(13) 42(2) 55(2) 43(2) 7(2) -1(2) 13(2)

C(14) 60(4) 70(4) 98(5) 13(3) -14(3) 21(3)

C(15) 60(4) 67(3) 64(3) -9(3) -15(3) 8(3)

C(16) 33(2) 55(2) 44(2) 0(2) 4(2) -1(2)

C(17) 62(3) 62(3) 63(3) -20(2) -13(3) -5(3)

C(18) 62(3) 61(3) 55(3) 1(2) -10(3) 6(2)

C(19) 32(2) 24(2) 27(2) -2(1) 13(2) -3(1)

C(20) 31(2) 34(2) 34(2) 2(1) 11(2) 0(1)

C(21) 36(2) 42(2) 54(3) 4(2) 24(2) 4(2)

C(22) 50(3) 39(2) 38(2) 1(2) 24(2) -1(2)

C(23) 58(3) 37(2) 29(2) -2(2) 17(2) -8(2)

C(24) 39(2) 35(2) 26(2) 1(1) 9(2) -2(2)

C(25) 42(3) 61(3) 48(3) -6(2) 10(2) 2(2)

C(26) 66(4) 88(4) 66(4) 2(3) -15(3) 11(3)

C(27) 69(4) 77(3) 82(4) -19(3) -4(3) -19(3)

C(28) 46(3) 55(2) 33(2) 1(2) 7(2) 0(2)

C(29) 57(4) 87(4) 82(4) -14(3) -16(3) -8(3)

C(30) 62(4) 75(4) 90(4) 29(3) 4(3) 15(3)

______________________________________________________________________________

**Table 5.** Hydrogen coordinates ( x 104) and isotropic displacement parameters (Å2x 103)

for IPrCO2 (**3**).

________________________________________________________________________________

x y z U(eq)

________________________________________________________________________________________________________________________________________________________________________________________________________

H(4) 3640(20) 3880(20) 1393(18) 25(8)

H(5) 2410(30) 3740(30) 2600(19) 34(9)

H(9) 2000(30) 950(20) 4850(20) 41(10)

H(10) 300(30) 640(20) 4539(19) 31(8)

H(11) -550(30) 980(30) 3300(20) 60(12)

H(13) 3920(30) 1950(30) 3420(20) 58(11)

H(14A) 4080(40) 120(40) 3950(30) 78(16)

G(14B) 4960(40) 880(30) 4340(20) 67(13)

H(14C) 3810(40) 570(40) 4820(30) 87(17)

H(15A) 3380(40) 3180(40) 4230(30) 94(18)

H(15B) 4460(50) 2730(40) 4570(30) 95(18)

H(15C) 3480(40) 2340(40) 5080(40) 114(19)

H(16) 970(30) 1920(30) 1640(20) 61(12)

H(17A) -520(30) 940(30) 1020(30) 57(12)

H(17B) 240(30) 220(30) 1580(20) 46(11)

H(17C) -760(40) 620(30) 2030(30) 72(14)

H(18A) -550(40) 2870(30) 1410(30) 80(15)

H(18B) -10(40) 3300(30) 2190(30) 65(14)

H(18C) -1010(40) 2490(40) 2220(30) 86(17)

H(21) 6640(30) 1360(30) 380(20) 58(12)

H(22) 5860(30) 1160(30) -910(20) 60(12)

H(23) 4090(30) 1390(30) -1180(20) 48(10)

H(25) 5280(40) 2100(30) 2110(20) 66(12)

H(26A) 7140(40) 1030(40) 1710(30) 83(16)

H(26B) 6890(40) 1170(30) 2600(30) 78(14)

H(26C) 6020(40) 400(40) 2070(30) 94(17)

H(27A) 6024 3603 1535 114

H(27B) 7095 2952 1428 114

H(27C) 6722 3217 2308 114

H(28) 2270(30) 2150(20) 320(20) 40(9)

H(29A) 2340(30) 1060(30) -1120(30) 63(14)

H(29B) 2090(40) 540(40) -200(30) 80(16)

H(29C) 1260(50) 1260(40) -700(30) 92(16)

H(30A) 2790(40) 2930(40) -1280(30) 112(19)

H(30B) 2750(50) 3650(50) -480(30) 110(20)

H(30C) 1680(40) 3280(40) -800(30) 88(16)

________________________________________________________________________________

**Table 6.** Torsion angles [°] for IPrCO2 (**3**).

________________________________________________________________

C(4)-N(3)-C(2)-N(1) 0.7(4)

C(19)-N(3)-C(2)-N(1) -179.7(3)

C(4)-N(3)-C(2)-C(6) -179.1(3)

C(19)-N(3)-C(2)-C(6) 0.5(5)

C(5)-N(1)-C(2)-N(3) -0.7(4)

C(7)-N(1)-C(2)-N(3) 178.9(3)

C(5)-N(1)-C(2)-C(6) 179.1(3)

C(7)-N(1)-C(2)-C(6) -1.3(5)

C(2)-N(3)-C(4)-C(5) -0.5(4)

C(19)-N(3)-C(4)-C(5) 180.0(3)

N(3)-C(4)-C(5)-N(1) 0.0(4)

C(2)-N(1)-C(5)-C(4) 0.5(4)

C(7)-N(1)-C(5)-C(4) -179.2(3)

N(3)-C(2)-C(6)-O(2) 89.7(4)

N(1)-C(2)-C(6)-O(2) -90.1(4)

N(3)-C(2)-C(6)-O(1) -92.0(4)

N(1)-C(2)-C(6)-O(1) 88.2(4)

C(2)-N(1)-C(7)-C(12) -89.5(4)

C(5)-N(1)-C(7)-C(12) 90.1(4)

C(2)-N(1)-C(7)-C(8) 90.7(4)

C(5)-N(1)-C(7)-C(8) -89.7(4)

C(12)-C(7)-C(8)-C(9) -2.6(5)

N(1)-C(7)-C(8)-C(9) 177.3(3)

C(12)-C(7)-C(8)-C(13) 178.9(3)

N(1)-C(7)-C(8)-C(13) -1.3(4)

C(7)-C(8)-C(9)-C(10) 1.0(5)

C(13)-C(8)-C(9)-C(10) 179.6(3)

C(8)-C(9)-C(10)-C(11) 0.7(5)

C(9)-C(10)-C(11)-C(12) -1.1(5)

C(8)-C(7)-C(12)-C(11) 2.3(5)

N(1)-C(7)-C(12)-C(11) -177.5(3)

C(8)-C(7)-C(12)-C(16) -179.9(3)

N(1)-C(7)-C(12)-C(16) 0.3(4)

C(10)-C(11)-C(12)-C(7) -0.4(5)

C(10)-C(11)-C(12)-C(16) -178.3(3)

C(7)-C(8)-C(13)-C(15) 108.5(4)

C(9)-C(8)-C(13)-C(15) -69.9(4)

C(7)-C(8)-C(13)-C(14) -127.3(4)

C(9)-C(8)-C(13)-C(14) 54.2(5)

C(7)-C(12)-C(16)-C(17) 126.8(4)

C(11)-C(12)-C(16)-C(17) -55.4(5)

C(7)-C(12)-C(16)-C(18) -108.0(4)

C(11)-C(12)-C(16)-C(18) 69.8(5)

C(2)-N(3)-C(19)-C(20) -88.9(4)

C(4)-N(3)-C(19)-C(20) 90.6(4)

C(2)-N(3)-C(19)-C(24) 88.6(4)

C(4)-N(3)-C(19)-C(24) -91.8(4)

C(24)-C(19)-C(20)-C(21) 0.5(5)

N(3)-C(19)-C(20)-C(21) 177.8(3)

C(24)-C(19)-C(20)-C(25) 179.7(3)

N(3)-C(19)-C(20)-C(25) -3.0(4)

C(19)-C(20)-C(21)-C(22) 0.3(5)

C(25)-C(20)-C(21)-C(22) -179.0(3)

C(20)-C(21)-C(22)-C(23) -0.9(5)

C(21)-C(22)-C(23)-C(24) 0.8(5)

C(20)-C(19)-C(24)-C(23) -0.5(4)

N(3)-C(19)-C(24)-C(23) -177.8(3)

C(20)-C(19)-C(24)-C(28) -179.5(3)

N(3)-C(19)-C(24)-C(28) 3.2(4)

C(22)-C(23)-C(24)-C(19) -0.1(5)

C(22)-C(23)-C(24)-C(28) 178.9(3)

C(19)-C(20)-C(25)-C(26) 129.7(4)

C(21)-C(20)-C(25)-C(26) -51.0(5)

C(19)-C(20)-C(25)-C(27) -103.7(4)

C(21)-C(20)-C(25)-C(27) 75.5(4)

C(19)-C(24)-C(28)-C(29) -127.8(4)

C(23)-C(24)-C(28)-C(29) 53.2(5)

C(19)-C(24)-C(28)-C(30) 106.4(4)

C(23)-C(24)-C(28)-C(30) -72.6(5)

________________________________________________________________
